# Supplementary material
Source: publisher figshare collection journal article supplement (https://acs.figshare.com/ndownloader/files/4154842)
Supplement: Supplementary file 1 [file 4154842]

## Supporting Information for

# A New Class of Tetradentate $\beta$ -Diketonate-Europium Complexes That Can Be Covalently Bound to Proteins for Time-Gated Fluorometric Application

Lin Zhang,<sup>†</sup> Yanjiao Wang,<sup>†</sup> Zhiqiang Ye,<sup>\*,†</sup> Dayong Jin,<sup>‡</sup> and Jingli Yuan<sup>\*,†</sup>

<sup>†</sup>State Key Laboratory of Fine Chemicals, School of Chemistry, Dalian University of Technology, Dalian 116024, P. R. China, and <sup>‡</sup>MQ Photonics Centre, Faculty of Science, Macquarie University, NSW 2109, Sydney, Australia.

## Supplementary Figures

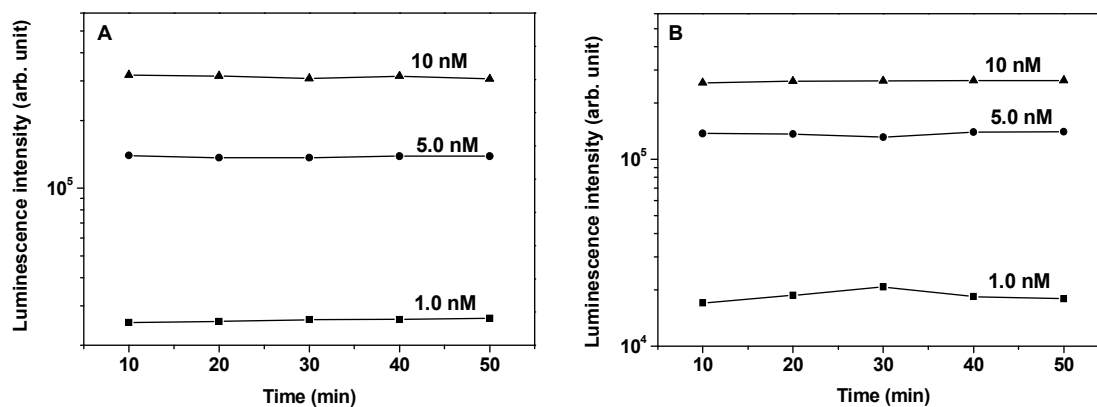

**Figure S1.** Time-dependent luminescence intensities of BHHBCB-Eu<sup>3+</sup> (A) and BHHCT-Eu<sup>3+</sup> (B) at lower concentrations (1.0, 5.0, 10 nM) in 0.05 M Tris-HCl buffer of pH 7.8. The water-soluble BSA conjugates of two Eu<sup>3+</sup> complexes were used for measurements on the Perkin-Elmer Victor 1420 multilabel counter.

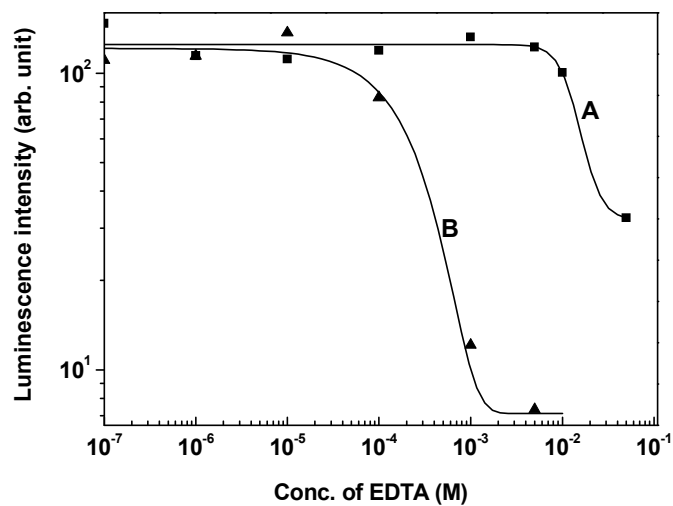

**Figure S2.** Luminescence intensities of BHHBCB-Eu<sup>3+</sup> (A,  $1.0 \times 10^{-6}$  M) and BHHCT-Eu<sup>3+</sup> (B,  $1.0 \times 10^{-6}$  M) in the presence of different concentrations of EDTA in 0.05 M Tris-HCl buffer of pH 7.8. The water-soluble BSA conjugates of two Eu<sup>3+</sup> complexes were used for the measurements on the Perkin Elmer LS 50B luminescence spectrometer with time-gated mode.
